# Supplementary material for: Experimental, DFT and docking simulations of the binding of diapocynin to human serum albumin: induced circular dichroism
Source: Royal Society of Chemistry journal article supplement (doi:10.1039/c5ra10960d), 2015-01-01

## Supporting Information

### Molar Absorption Coefficient of Diapocynin

Absorption spectrum and determination of molar absorption coefficient of diapocynin  
in 0.05 mM phosphate buffer, pH 7.0

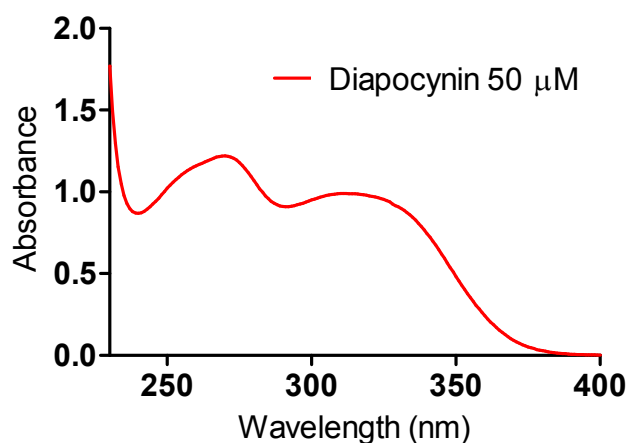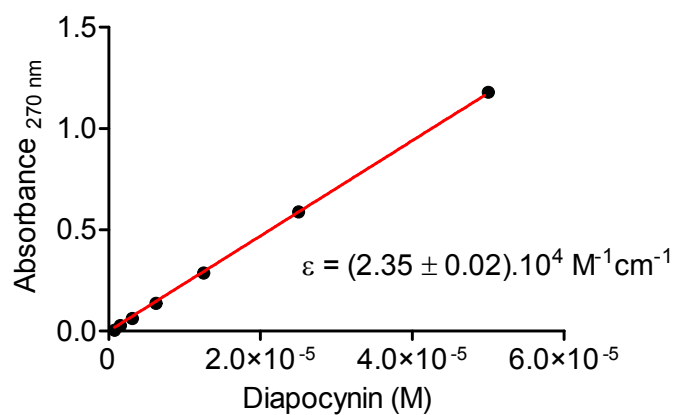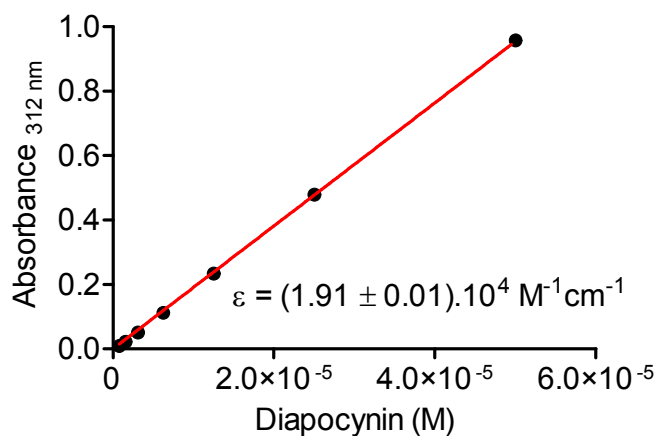

## Number of Binding Sites

Quenching of the intrinsic fluorescence of HSA ( $5 \mu\text{M}$ ;  $\lambda_{\text{ex}} = 280 \text{ nm}$ ) by diapocynin in the absence **(a)** or presence of  $5 \mu\text{M}$  warfarin **(b)** or  $5 \mu\text{M}$  ibuprofen **(c)**. The experiments were performed in  $0.05 \text{ M}$  phosphate buffer,  $\text{pH } 7.0$  at  $25^\circ\text{C}$ . The determinations of the binding constants **(d)** were performed by fitting the data in the double logarithm equation:  $\log [(F_0-F)/F] = \log K_a + n \cdot \log [Q]$ . The results are the average and SD of experiments performed in triplicate. The binding constants ( $K_a$ ) and stoichiometry of the binding ( $n$ ) were: warfarin + diapocynin ( $6.27 \times 10^5 \text{ mol}^{-1} \cdot \text{L}$ ,  $n = 0.66$ ); ibuprofen + diapocynin ( $1.49 \times 10^5 \text{ mol}^{-1} \cdot \text{L}$ ,  $n = 1.18$ ); only diapocynin ( $1.42 \times 10^5 \text{ mol}^{-1} \cdot \text{L}$ ,  $n = 1.17$ ).

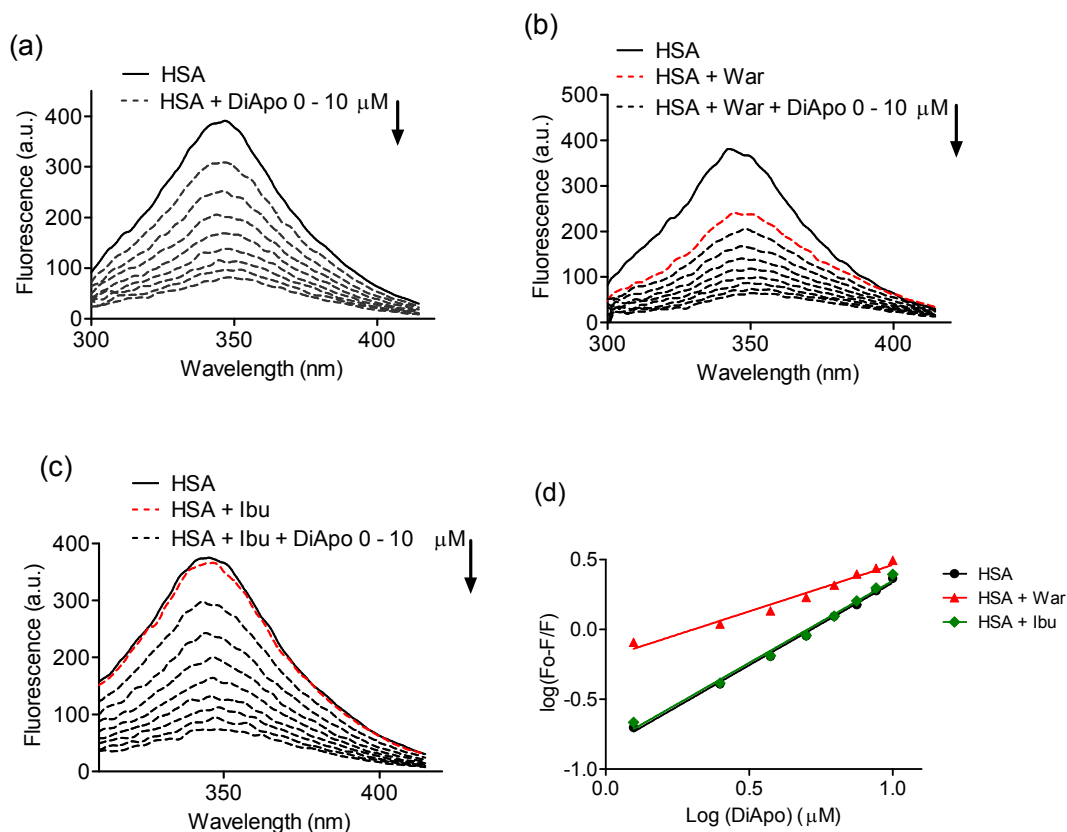

### Absence of Induced Ellipticity for Apocynin

The binding of apocynin with HSA did not provoke the generation of an induced circular dichroism signal. **(a)** Near-UV-CD and **(b)** UV-Vis spectra of HSA in the presence or absence of apocynin (Apo). The mixtures consisted of 30  $\mu\text{M}$  HSA and 30  $\mu\text{M}$  apocynin in 0.05 M phosphate buffer, pH 7.0 at 25°C.

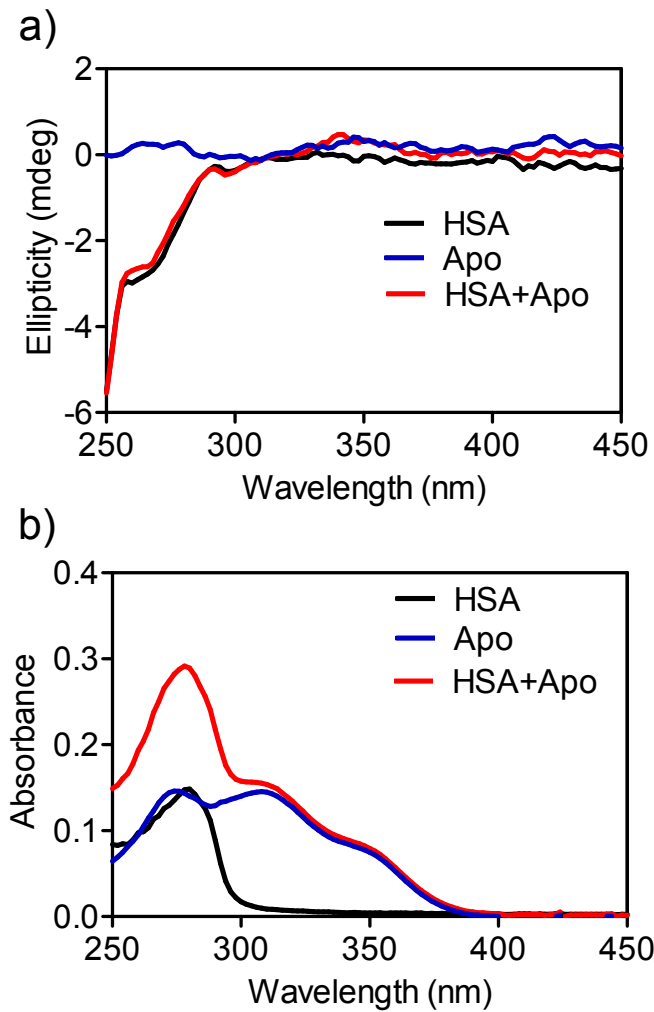

### Absence of Induced Ellipticity for Warfarin and Ibuprofen

The binding of warfarin and ibuprofen with HSA did not provoke the generation of an induced circular dichroism signal. **(a)** Near-UV-CD and **(b)** UV-Vis spectra of HSA in the presence or absence of warfarin (War) or ibuprofen (Ibu). The mixtures consisted of 30  $\mu\text{M}$  HSA and 30  $\mu\text{M}$  ligands in 0.05 M phosphate buffer, pH 7.0 at 25°C.

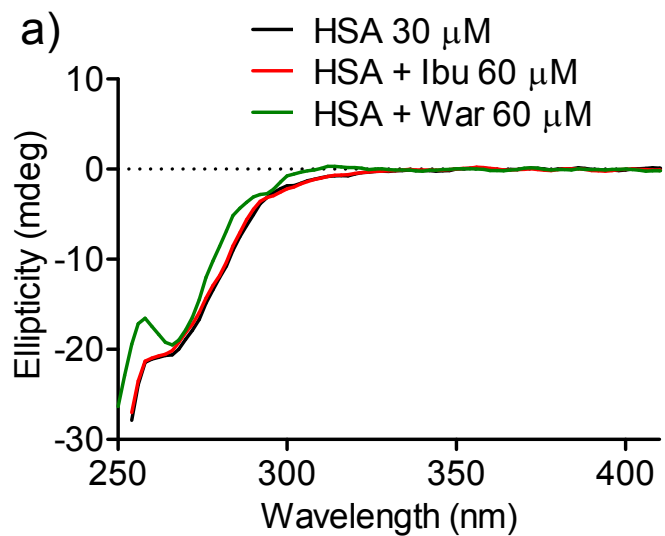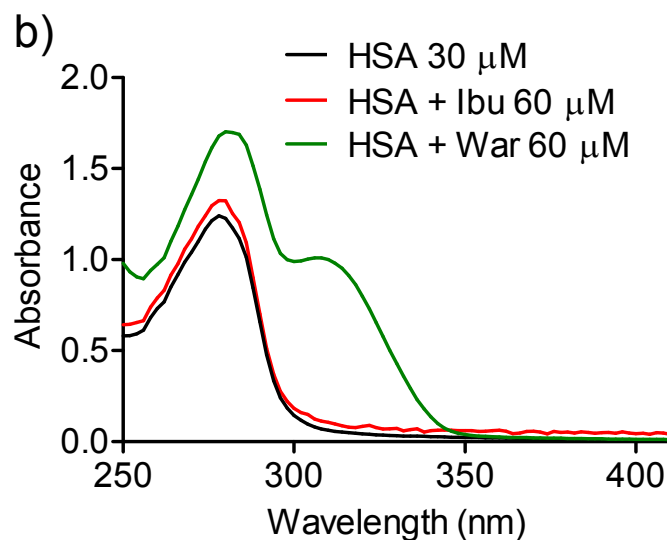

**Cartesian coordinates of the *syn-aS* conformer.**

| <b>Atom</b> | <b>X</b>  | <b>Y</b>  | <b>Z</b>  |
|-------------|-----------|-----------|-----------|
| C           | -1.462416 | -1.002983 | 0.519662  |
| C           | -0.737174 | 0.057761  | -0.019818 |
| C           | -1.432232 | 1.105077  | -0.623767 |
| C           | -2.837561 | 1.093448  | -0.655056 |
| C           | -3.546329 | 0.041448  | -0.105855 |
| C           | -2.851739 | -1.024949 | 0.483748  |
| C           | 0.745291  | 0.064166  | 0.018713  |
| C           | 1.432256  | 1.116597  | 0.615099  |
| C           | 2.840900  | 1.111860  | 0.650715  |
| C           | 3.553205  | 0.063916  | 0.110211  |
| C           | 2.866501  | -1.008393 | -0.477664 |
| C           | 1.478385  | -0.998798 | -0.516610 |
| O           | 0.757635  | 2.128366  | 1.191998  |
| O           | 3.371506  | 2.207492  | 1.267085  |
| C           | 4.782402  | 2.274405  | 1.370918  |
| C           | 3.678943  | -2.124831 | -1.048875 |
| O           | 4.888752  | -2.094151 | -1.004063 |
| O           | -0.761982 | 2.114530  | -1.208638 |
| O           | -3.377269 | 2.183854  | -1.276817 |
| C           | -4.786541 | 2.260883  | -1.360287 |
| C           | -3.562312 | -2.192616 | 1.089107  |
| C           | -5.076985 | -2.196106 | 1.086398  |
| C           | 2.955273  | -3.292262 | -1.682752 |
| O           | -2.944876 | -3.115064 | 1.570283  |
| H           | 5.005094  | 3.204507  | 1.888210  |
| H           | 5.167678  | 1.428751  | 1.947300  |
| H           | 5.243527  | 2.283319  | 0.379387  |
| H           | 1.402589  | 2.755780  | 1.542421  |
| H           | 3.693904  | -4.007293 | -2.037852 |
| H           | 2.294161  | -3.773522 | -0.958382 |
| H           | 2.340404  | -2.952891 | -2.519652 |
| H           | 0.931016  | -1.812180 | -0.978514 |
| H           | 4.634798  | 0.030866  | 0.124752  |
| H           | -4.627458 | 0.040345  | -0.136773 |
| H           | -0.942738 | -1.825541 | 0.997449  |
| H           | -1.406618 | 2.744806  | -1.553860 |
| H           | -5.011056 | 3.189163  | -1.880171 |
| H           | -5.189376 | 1.416558  | -1.927662 |
| H           | -5.234246 | 2.282644  | -0.362229 |
| H           | -5.459126 | -2.164914 | 0.063078  |
| H           | -5.421972 | -3.104280 | 1.575279  |
| H           | -5.465065 | -1.323227 | 1.616744  |

Cartesian coordinates of the *anti-aS* conformer.

| Atom | X         | Y         | Z         |
|------|-----------|-----------|-----------|
| C    | 1.560067  | -0.947025 | 0.447803  |
| C    | 0.732243  | 0.068503  | -0.035084 |
| C    | 1.328594  | 1.238376  | -0.505713 |
| C    | 2.727449  | 1.379246  | -0.493663 |
| C    | 3.533650  | 0.366109  | -0.013276 |
| C    | 2.941487  | -0.811553 | 0.466928  |
| C    | -0.744753 | -0.077505 | -0.037755 |
| C    | -1.338717 | -1.237507 | -0.527474 |
| C    | -2.741318 | -1.382357 | -0.510266 |
| C    | -3.544481 | -0.381769 | -0.012065 |
| C    | -2.954085 | 0.791887  | 0.480698  |
| C    | -1.574547 | 0.932605  | 0.462861  |
| O    | -0.583709 | -2.232067 | -1.038024 |
| O    | -3.169096 | -2.570128 | -1.028460 |
| C    | -4.566517 | -2.798315 | -1.059395 |
| C    | -3.859726 | 1.856911  | 1.007502  |
| O    | -5.060718 | 1.701131  | 1.011818  |
| O    | 0.573160  | 2.249252  | -0.991460 |
| O    | 3.158233  | 2.575944  | -0.995529 |
| C    | 4.554114  | 2.789719  | -1.070798 |
| C    | 3.760945  | -1.939831 | 1.009350  |
| C    | 5.269493  | -1.800630 | 1.006295  |
| C    | -3.240830 | 3.133950  | 1.531787  |
| O    | 3.235303  | -2.938470 | 1.443132  |
| H    | -4.703861 | -3.781743 | -1.502529 |
| H    | -4.982625 | -2.786482 | -0.048251 |
| H    | -5.067818 | -2.043256 | -1.671332 |
| H    | -1.175943 | -2.936666 | -1.330607 |
| H    | -4.038155 | 3.795492  | 1.862820  |
| H    | -2.570417 | 2.918763  | 2.367060  |
| H    | -2.653260 | 3.622675  | 0.751152  |
| H    | -1.109046 | 1.834591  | 0.837757  |
| H    | -4.623399 | -0.462362 | 0.013571  |
| H    | 4.608902  | 0.482685  | -0.007523 |
| H    | 1.127121  | -1.867239 | 0.818548  |
| H    | 1.169781  | 2.941024  | -1.304947 |
| H    | 4.688457  | 3.777010  | -1.506403 |
| H    | 5.005340  | 2.764664  | -0.074464 |
| H    | 5.027680  | 2.038338  | -1.709666 |
| H    | 5.575561  | -0.946658 | 1.615886  |
| H    | 5.702067  | -2.711506 | 1.413755  |
| H    | 5.641023  | -1.639795 | -0.008523 |

Cartesian coordinates of the *anti-aR* conformer.

| Atom | X         | Y         | Z         |
|------|-----------|-----------|-----------|
| C    | 1.560083  | -0.947000 | -0.447786 |
| C    | 0.732241  | 0.068524  | 0.035080  |
| C    | 1.328571  | 1.238417  | 0.505683  |
| C    | 2.727424  | 1.379311  | 0.493630  |
| C    | 3.533643  | 0.366179  | 0.013265  |
| C    | 2.941500  | -0.811504 | -0.466915 |
| C    | -0.744752 | -0.077511 | 0.037755  |
| C    | -1.338694 | -1.237514 | 0.527499  |
| C    | -2.741292 | -1.382390 | 0.510295  |
| C    | -3.544474 | -0.381827 | 0.012074  |
| C    | -2.954100 | 0.791829  | -0.480714 |
| C    | -1.574565 | 0.932574  | -0.462882 |
| O    | -0.583666 | -2.232049 | 1.038067  |
| O    | -3.169047 | -2.570158 | 1.028515  |
| C    | -4.566464 | -2.798371 | 1.059456  |
| C    | -3.859762 | 1.856826  | -1.007539 |
| O    | -5.060750 | 1.701023  | -1.011849 |
| O    | 0.573120  | 2.249290  | 0.991410  |
| O    | 3.158186  | 2.576028  | 0.995471  |
| C    | 4.554063  | 2.789833  | 1.070730  |
| C    | 3.760977  | -1.939778 | -1.009313 |
| C    | 5.269523  | -1.800553 | -1.006258 |
| C    | -3.240890 | 3.133864  | -1.531853 |
| O    | 3.235352  | -2.938434 | -1.443079 |
| H    | -4.703789 | -3.781792 | 1.502610  |
| H    | -5.067778 | -2.043308 | 1.671377  |
| H    | -4.982573 | -2.786567 | 0.048312  |
| H    | -1.175888 | -2.936653 | 1.330666  |
| H    | -4.038227 | 3.795383  | -1.862901 |
| H    | -2.653331 | 3.622618  | -0.751226 |
| H    | -2.570471 | 2.918672  | -2.367118 |
| H    | -1.109081 | 1.834560  | -0.837796 |
| H    | -4.623390 | -0.462441 | -0.013559 |
| H    | 4.608893  | 0.482774  | 0.007508  |
| H    | 1.127152  | -1.867229 | -0.818511 |
| H    | 1.169730  | 2.941079  | 1.304883  |
| H    | 4.688388  | 3.777135  | 1.506312  |
| H    | 5.027647  | 2.038475  | 1.709613  |
| H    | 5.005286  | 2.764764  | 0.074395  |
| H    | 5.575578  | -0.946591 | -1.615868 |
| H    | 5.641047  | -1.639688 | 0.008558  |
| H    | 5.702113  | -2.711432 | -1.413696 |

Cartesian coordinates of the *syn-aR* conformer.

| Atom | X         | Y         | Z         |
|------|-----------|-----------|-----------|
| C    | -1.462401 | -1.002909 | -0.519896 |
| C    | -0.737153 | 0.057842  | 0.019551  |
| C    | -1.432215 | 1.105225  | 0.623365  |
| C    | -2.837542 | 1.093646  | 0.654551  |
| C    | -3.546312 | 0.041618  | 0.105428  |
| C    | -2.851729 | -1.024840 | -0.484024 |
| C    | 0.745306  | 0.064201  | -0.018813 |
| C    | 1.432340  | 1.116614  | -0.615151 |
| C    | 2.840966  | 1.111871  | -0.650610 |
| C    | 3.553184  | 0.063917  | -0.110001 |
| C    | 2.866409  | -1.008383 | 0.477803  |
| C    | 1.478299  | -0.998767 | 0.516605  |
| O    | 0.757783  | 2.128410  | -1.192145 |
| O    | 3.371609  | 2.207494  | -1.266963 |
| C    | 4.782495  | 2.274286  | -1.370994 |
| C    | 3.678816  | -2.124774 | 1.049132  |
| O    | 4.888632  | -2.093988 | 1.004651  |
| O    | -0.761987 | 2.114758  | 1.208187  |
| O    | -3.377253 | 2.184145  | 1.276135  |
| C    | -4.786492 | 2.260499  | 1.360721  |
| C    | -3.562268 | -2.192539 | -1.089331 |
| C    | -5.076924 | -2.196164 | -1.086170 |
| C    | 2.955022  | -3.292254 | 1.682746  |
| O    | -2.944851 | -3.114837 | -1.570824 |
| H    | 5.005173  | 3.204308  | -1.888430 |
| H    | 5.243766  | 2.283280  | -0.379529 |
| H    | 5.167620  | 1.428520  | -1.947319 |
| H    | 1.402814  | 2.755809  | -1.542500 |
| H    | 3.693533  | -4.007463 | 2.037751  |
| H    | 2.340216  | -2.952920 | 2.519714  |
| H    | 2.293840  | -3.773271 | 0.958281  |
| H    | 0.930846  | -1.812120 | 0.978469  |
| H    | 4.634776  | 0.030861  | -0.124426 |
| H    | -4.627449 | 0.040579  | 0.136264  |
| H    | -0.942713 | -1.825506 | -0.997601 |
| H    | -1.406688 | 2.745004  | 1.553388  |
| H    | -5.011025 | 3.188587  | 1.880937  |
| H    | -5.234999 | 2.282224  | 0.363019  |
| H    | -5.188455 | 1.415855  | 1.928247  |
| H    | -5.458835 | -2.164166 | -0.062794 |
| H    | -5.465095 | -1.323680 | -1.617121 |
| H    | -5.422037 | -3.104684 | -1.574324 |



### Cartesian coordinates of the Transition State (TS).

| Atom | X         | Y         | Z         |
|------|-----------|-----------|-----------|
| C    | -1.529733 | -0.747877 | -0.789299 |
| C    | -0.742159 | 0.051382  | 0.042711  |
| C    | -1.381117 | 0.970742  | 0.883960  |
| C    | -2.789262 | 1.080729  | 0.879538  |
| C    | -3.557279 | 0.281449  | 0.047178  |
| C    | -2.925474 | -0.647889 | -0.803380 |
| C    | 0.747754  | -0.056814 | 0.041144  |
| C    | 1.386915  | -1.007095 | 0.843054  |
| C    | 2.797490  | -1.119343 | 0.829375  |
| C    | 3.560203  | -0.289631 | 0.030163  |
| C    | 2.929000  | 0.676313  | -0.778861 |
| C    | 1.534746  | 0.779049  | -0.761358 |
| O    | 0.660400  | -1.830062 | 1.638471  |
| O    | 3.268489  | -2.101773 | 1.666702  |
| C    | 4.674753  | -2.300872 | 1.733126  |
| C    | 3.799018  | 1.547128  | -1.620161 |
| O    | 5.017072  | 1.421094  | -1.602990 |
| O    | -0.651925 | 1.764849  | 1.706460  |
| O    | -3.260452 | 2.028656  | 1.758525  |
| C    | -4.664597 | 2.211205  | 1.860598  |
| C    | -3.690428 | -1.535996 | -1.726853 |
| C    | -5.211160 | -1.449594 | -1.738939 |
| C    | 3.150380  | 2.601517  | -2.504776 |
| O    | -3.115719 | -2.323239 | -2.465984 |
| H    | 4.830955  | -3.115357 | 2.442322  |
| H    | 5.080424  | -2.582574 | 0.753732  |
| H    | 5.184979  | -1.398129 | 2.090845  |
| H    | 1.295910  | -2.406183 | 2.101138  |
| H    | 3.935982  | 3.136703  | -3.040898 |
| H    | 2.464980  | 2.144057  | -3.228076 |
| H    | 2.568204  | 3.313935  | -1.908329 |
| H    | 1.029881  | 1.515601  | -1.377330 |
| H    | 4.641630  | -0.349136 | -0.003343 |
| H    | -4.636651 | 0.373544  | 0.051735  |
| H    | -1.061478 | -1.471169 | -1.448034 |
| H    | -1.285210 | 2.311052  | 2.206460  |
| H    | -4.815076 | 2.990470  | 2.609528  |
| H    | -5.093443 | 2.536757  | 0.904170  |
| H    | -5.161980 | 1.289093  | 2.187313  |
| H    | -5.549689 | -0.442967 | -2.013065 |
| H    | -5.593387 | -2.166838 | -2.467177 |
| H    | -5.629669 | -1.680028 | -0.751683 |

Thermodynamic parameters (atomic unit) to the four conformers (*syn-aS*, *anti-aS*, *anti-aR* and *syn-aR*) and to the transition state (TS).

| Conformer         | ZPE    | Thermal Correction to |          |                   |
|-------------------|--------|-----------------------|----------|-------------------|
|                   |        | Energy                | Enthalpy | Gibbs Free Energy |
| <i>syn-aS</i>     | 0.3329 | 0.3564                | 0.3573   | 0.2791            |
| <i>anti-aS</i>    | 0.3335 | 0.3568                | 0.3578   | 0.2804            |
| <i>anti-aR</i>    | 0.3335 | 0.3568                | 0.3578   | 0.2804            |
| <i>syn-aR</i>     | 0.3329 | 0.3564                | 0.3573   | 0.2791            |
| TS <sup>(a)</sup> | 0.3309 | 0.3538                | 0.3547   | 0.2786            |

<sup>(a)</sup>  $\nu_1 = -18.51 \text{ cm}^{-1}$ . The normal mode of vibration associated with this frequency corresponds to the torsional movement of the dihedral angle. This angle appears between the phenyl rings.

# NMR spectra of diapocynin (CDCl<sub>3</sub> and DMSO-D<sub>6</sub> solutions)

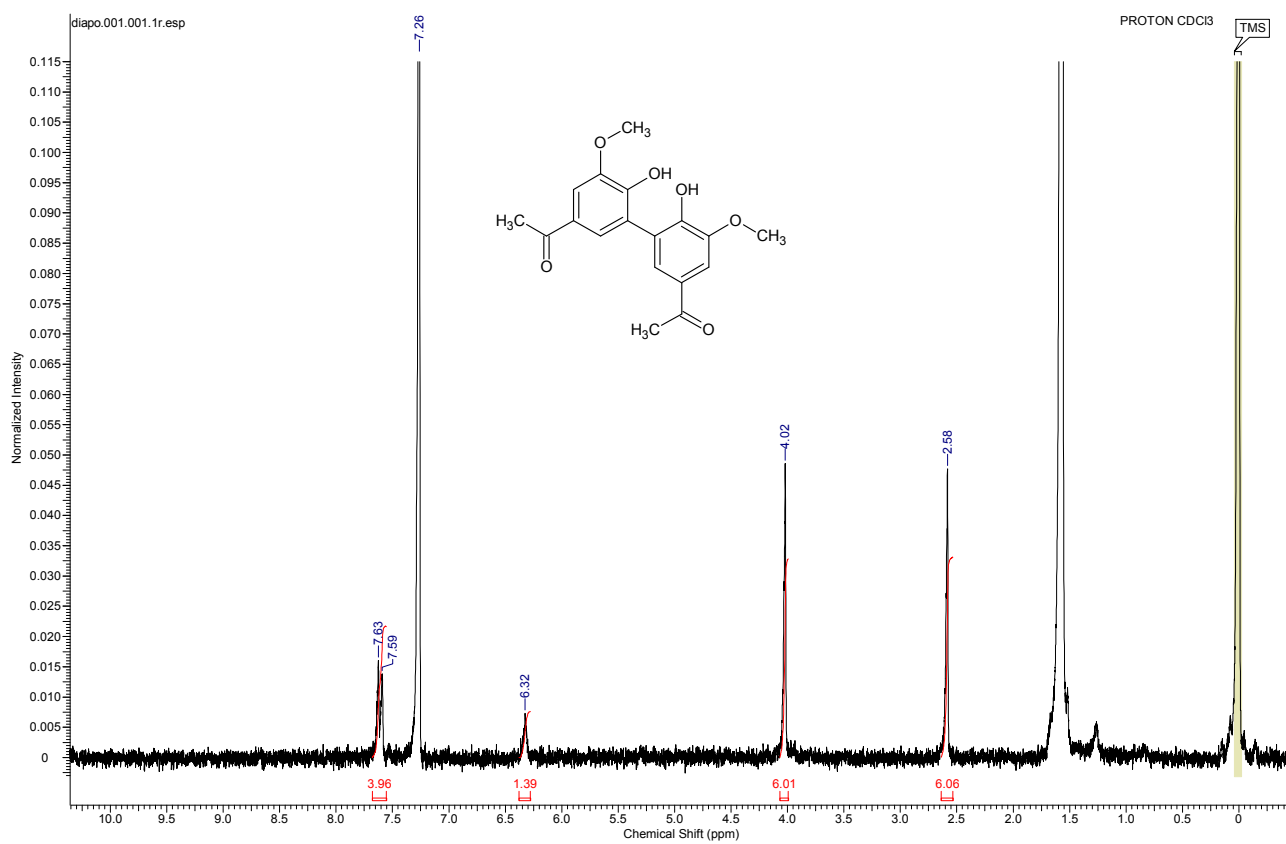

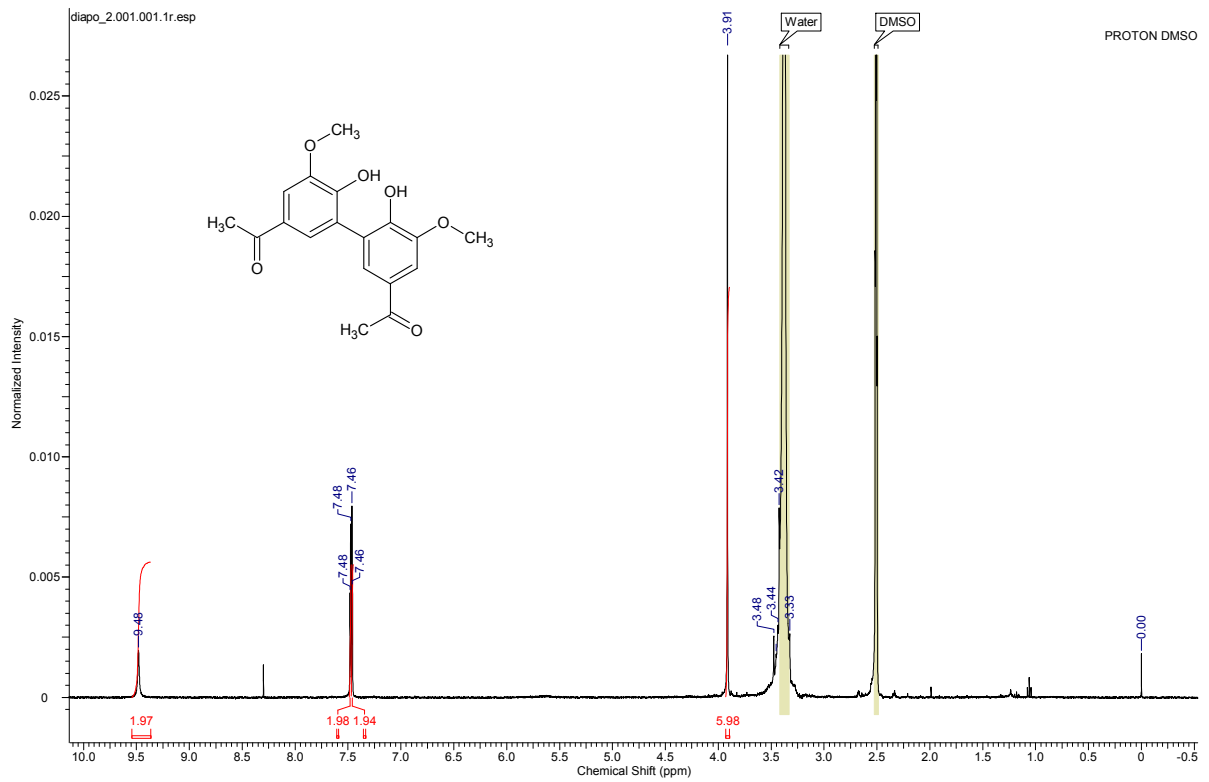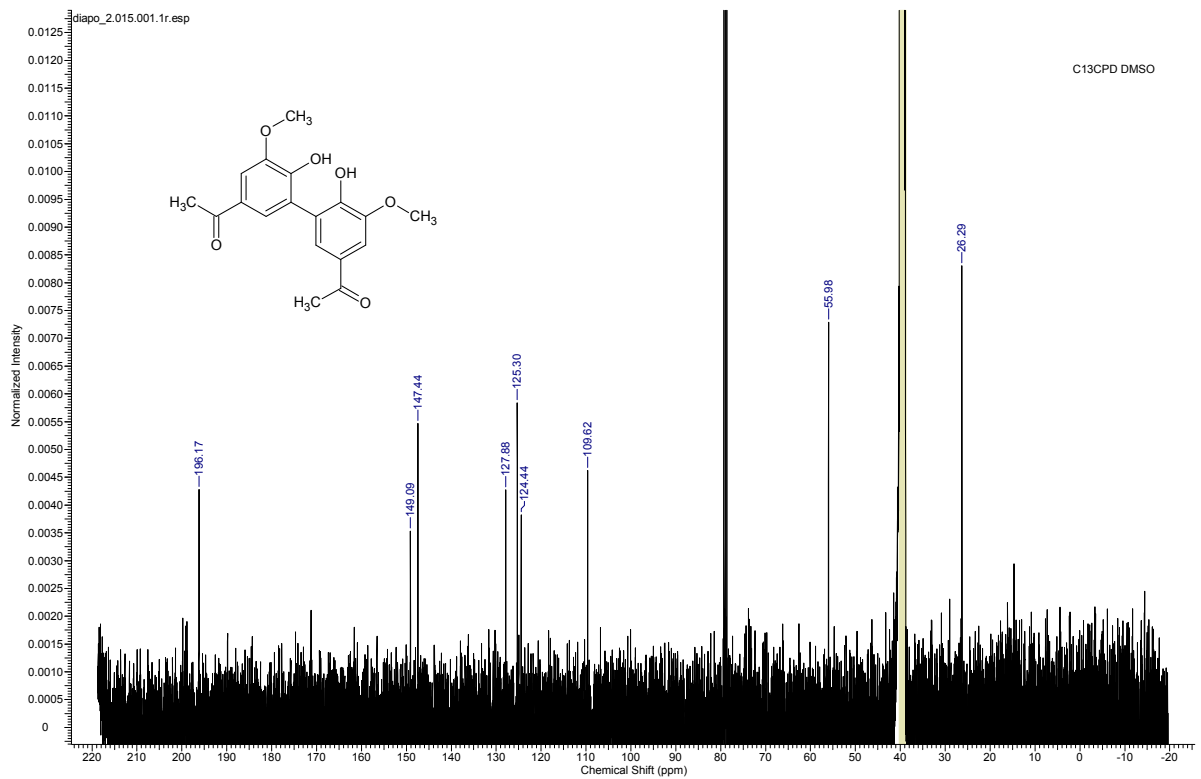

# MS and MS/MS spectra of diapocynin

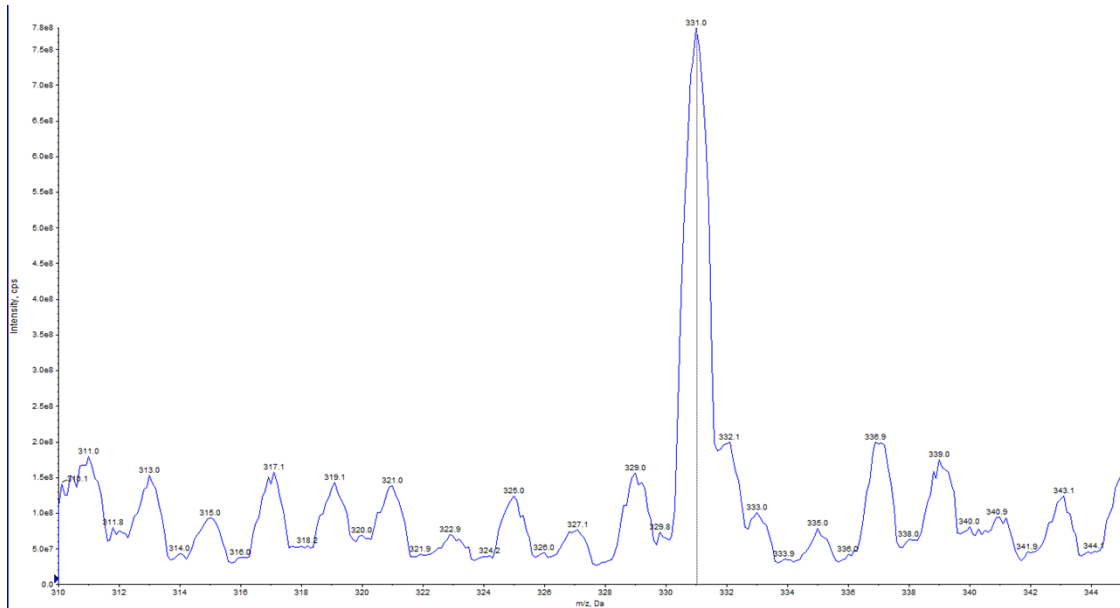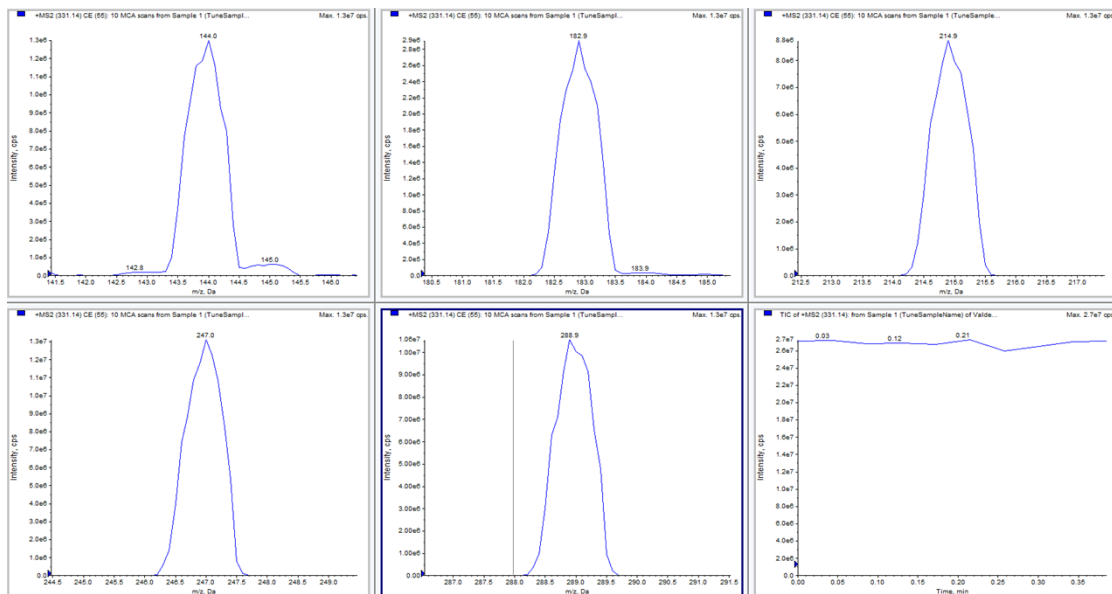

Supplement: c5ra10960d1.pdf [file c5ra10960d1.pdf]
